# Supplementary material for: Physiological and Molecular Responses to Altered Sodium Intake in Rat Pregnancy
Source: PubMed Central journal article supplement — J Am Heart Assoc. 2018 Jul 28;7(15):e008363. doi: 10.1161/JAHA.117.008363 (PMC6201473; doi:10.1161/jaha.117.008363), 2018-07-28
Supplement: JAH3-7-e008363-s001.pdf [file JAH3-7-e008363-s001.pdf]

# **SUPPLEMENTAL MATERIAL**

## Data S1.

### Supplemental Methods

#### *Implantation of telemetry, BP measurement and metabolic cages*

BP telemetry devices, TA11PA-C40 (Data Science International, St Paul, MN, USA), were implanted as previously described (1) in the abdominal aorta of the rats. In short, following midline abdominal incision, the aorta was prepared and punctured just above the bifurcation using a 23-gauche needle for insertion of the telemetry catheter. After sealing (Vetbond 3M, Aichele Medico, Aesch, Switzerland) and control of the catheter placement, the device battery was attached to the left lateral abdominal wall and the skin closed. The data (systolic and diastolic BP) were transmitted to a receiver and collected for 10s, every 15min (Fig. S2).

After 3w of recovery, the animals were transferred to metabolic cages for approximately 30h before mating and at days 3 to 4 (week 1), 10 to 11 (week 2), and 16 to 17 (week 3) of pregnancy. A second cohort of non-pregnant rats was placed in metabolic cage at the same time points. Urine was collected and food/water intake was monitored. Telemetric BP recordings were obtained for 3d before mating and throughout pregnancy when the animals were returned to their original cage.

#### *Urine analysis*

Urinary creatinine and  $\text{Na}^+$  excretion were determined in our central hospital laboratories using validated routine clinical methods.  $\text{Na}^+$  balance was calculated as the ratio of  $\text{Na}^+$  intake vs. urinary  $\text{Na}^+$  excretion, A high ratio thus indicates a  $\text{Na}^+$  retention.

#### *RNA extraction and TaqMan PCR analysis of components of the RAS in the renal cortex and medulla*

Independent frozen kidney specimens (n=3 animals) were pulverized in liquid nitrogen and homogenized by ultrasonic homogenizer (20s) with RNA being extracted using the SV total RNA isolation kit or by the Trizol method. Using 2ug of RNA, reverse transcription using the Super Script III RT-PCR system was completed (Invitrogen, USA). Homology-based quantitative TaqMan PCR was performed with Roche Universal Probe Library primers and probes for angiotensinogen, angiotensin converting enzyme, renin, angiotensin receptor 1a and 1b, and the ENaC subunits  $\alpha$ ,  $\beta$  and  $\gamma$  to identify and quantify the respective transcripts. Negative controls for the RT and the PCR reagents were assessed. The geometric mean of  $\beta$ -actin, HPRT1 and Hmbs served as endogenous controls (Supplemental Table S2). Each measurement was repeated in triplicates.

#### *Sample preparation for Western blot analysis*

Independent plasma membrane fractions (n=3 animals) were prepared of cortical and medullary renal specimens. The frozen kidney specimens were pulverized in liquid nitrogen and homogenized by ultrasonic homogenizer (20s) in ice-cold homogenisation buffer containing 250mmol/L sucrose, 10mmol/L triethanolamine, 10mmol/L  $\text{Na}^+$ -pyrophosphate, 1mmol/L  $\text{Na}^+$ -orthovanadate, 100mmol/L  $\text{Na}^+$ -fluoride, 1.3mg/10 $\mu$ l DMSO of N-ethylmaleimide and one tablet of complete protease inhibitor cocktail per 2ml (Roche, Grenzach-Wyhlen, Germany). The homogenate was centrifuged at 1,000g and 4°C for 5min and the supernatant was further centrifuged at 20,000g and 4°C for 60min to obtain a fraction enriched for plasma membranes. The pellet was resuspended in sucrose buffer containing phosphatase and protease inhibitors.

All protein concentrations from kidney cortex and medulla homogenates were determined using a colorimetric protein assay based on the biuret reaction (Pierce, BCA Protein Assay Kit, Thermo Scientific, Switzerland), using an albumin standard to establish a linear calibration curve.

*SDS-Polyacrylamide gel electrophoresis (SDS-PAGE) and immunoblotting*

The protein separation was performed by the SDS-Page method in an electrophoresis chamber (Biorad, California, USA) using an electrophoresis buffer consisting of 1% SDS, 192mmol/L glycine and 25mmol/L Tris at pH 8.3. The samples were dissolved in Laemmli buffer (3% SDS, 10% glycerol, 5% mercaptoethanol, 1% bromophenol blue, 95mmol/L Tris [pH 6.8]), denatured for 5min at 95°C, and loaded on 10% or 12% acrylamide gels. The molecular weight was determined with Page Ruler Plus prestained protein ladder (Thermo Fisher Scientific Inc., USA). The protein was transferred from the gel to a nitrocellulose membrane (Brunschiwig, The Netherlands) with a tank-sandwich Western blotting system under permanent cooling conditions. Equal loading and electrophoretic transfer quality of the proteins onto nitrocellulose membranes were verified using 0.1% Ponceau red staining. Membranes were blocked with 5% skim milk for 60min and then incubated overnight at 4°C with primary antibodies. Thereafter, membranes were extensively washed with 0.5% Tween/TBS solution and incubated with secondary antibodies for 2h. Immunoreactive bands were detected using an enhanced chemiluminescence kit (Amersham ECL Select Western Blotting Detection Reagent, GE Healthcare, UK) followed by subsequent acquisition using Syngene G:Box Chemi XX6 software (Cambridge, UK). Band intensity was evaluated using Image J and normalized to  $\beta$ -actin abundance with control values set as 100%. Each measurement was repeated in triplicates.

For Western blot previously well-characterized primary antibodies were used: The non-commercial polyclonal, anti-rabbit antibodies against full length  $\alpha$ -subunits of ENaC (1:500 (2)), against a synthetic peptide mapping to the N-terminal amino acids 46-68 (StressMarq Biosciences Inc., Victoria BC CANADA, catalogue # SPC-403; 1:500), against  $\beta$ -subunits of ENaC (1:500 (2)), against  $\gamma$ -subunits of ENaC (1:500 (2)), and against  $\beta$ -actin (Santa Cruz Biotechnology, Inc., USA; 1:2000). As secondary antibody was used HRP-conjugated affinity purified donkey anti-rabbit IgG (Jackson ImmunoResearch Laboratory Europe Ltd., UK; 1:5,000).

**Table S1. Impact of salt intake on body weight, food and water consumption in non-pregnant (n=3-5) and pregnant (n=4) rats.**

**Non-pregnant**

|                                                           | NS        | HS         | LS        | HS/LS     |            |
|-----------------------------------------------------------|-----------|------------|-----------|-----------|------------|
|                                                           |           |            |           | HS        | LS         |
| <b>Weight gain (day 20)</b><br>[% of initial body weight] | 14.0± 4.0 | 14.7± 1.3  | 8.9± 7.6  |           | 10.8± 6.6  |
| <b>Water intake</b><br>[ml/100g BW/d]                     | 12.0± 5.2 | 26.5± 1.5* | 15.9±12.5 | 26.5±1.8* | 10.4± 9.8§ |
| <b>Food intake</b><br>[g/100g BW/d]                       | 11.5± 0.6 | 14.0± 1.1  | 12.6± 0.9 | 13.2±1.7  | 11.9± 1.2  |

**Pregnant**

|                                                                 | NS        | HS          | LS           | HS/LS       |             |
|-----------------------------------------------------------------|-----------|-------------|--------------|-------------|-------------|
|                                                                 |           |             |              | HS          | LS          |
| <b>Weight gain (day 20)</b><br>[% of initial body weight]       | 45.7±11.8 | 30.1±11.7*  | 18.5± 9.3*** |             | 28.9± 6.4*  |
| <b>Weight gain (day 20)</b><br>[% of initial body weight/fetus] | 2.0± 0.9  | 1.4±1.4     | 0.8± 0.9*    |             | 1.2± 0.5    |
| <b>Water intake</b><br>[ml/100g BW/d]                           | 15.9± 9.4 | 29.6± 3.7** | 22.7± 5.2    | 32.0±5.4*** | 19.6± 6.2§  |
| <b>Food intake</b><br>[g/100g BW/d]                             | 14.1± 2.8 | 12.0± 2.0   | 13.0± 0.8    | 12.7±1.4    | 10.2± 0.9** |

Results in mean ± SD

\*P<0.05 \*\*P<0.001 \*\*\* P< 0.0001 vs. NS

§P<0.05 between the switch of salt diet (HS to LS)

**Table S2. Mean absolute expression levels of components of the RAS as assessed by TaqMan PCR (average Ct values).**

| <b>Gene</b>                        | <b>Cortex</b> | <b>Medulla</b> |
|------------------------------------|---------------|----------------|
| Angiotensinogen                    | 30            | 29             |
| ACE                                | 28            | 27             |
| Renin                              | 25            | 26             |
| Angiotensin receptor<br>subtype 1a | 29            | 28             |
| Angiotensin receptor<br>subtype 1b | 32            | 32             |
| ENaC- $\alpha$                     | 26            | 28             |
| ENaC- $\beta$                      | 28            | 28             |
| ENaC- $\gamma$                     | 31            | 33             |

**Table S3. Primers used in real-time PCR.**

| Gene            | Accession number | Primers                                                                                    | Probe | Amplicon size (nt) |
|-----------------|------------------|--------------------------------------------------------------------------------------------|-------|--------------------|
| Angiotensinogen | NM_134432.2      | 5'- GAT AAA GAA CCC GCC TCC TC -3'<br>5'- GCA CCC AAA AGG GTA GAC AG -3'                   | 62    | 117                |
| ACE             | NM_012544.1      | 5'- CCA ACA TCA CGG AGG AGA AT -3'<br>5'- CCT CTG CAA ACT CCT GGT TG -3'                   | 1     | 69                 |
| Renin           | NM_012642.4      | 5'- TGT AGC TTC AGT CTC CCG ACA -3'<br>5'- CGA GGG CAT TTT CTT GAG C -3'                   | 76    | 66                 |
| AGTR1a          | NM_030985.4      | 5'- CAC CCG ATC ACC GAT CAC -3'<br>5'- CAG CCA TTT TAT ACC AAT CTC TCA -3'                 | 53    | 110                |
| AGTR1b          | NM_031009.2      | 5'- GAC ACA CAC AGC CTT TCC AG -3'<br>5'- GCT CTC TGA CAC TAT TTA AAA TGC AC -3'           | 49    | 113                |
| ENaC- $\alpha$  | NM_031548.2      | 5'- CCA AGG GAG TTG AGT TCT GTG -3'<br>5'- AGG CGC CCT GCA GTT TAT -3'                     | 128   | 75                 |
| ENaC- $\beta$   | NM_012648.1      | 5'- GGC ATG ACA GAG AAG GCA CT -3'<br>5'- TGA CCA ATG TCC AGG ATC AA -3'                   | 95    | 77                 |
| ENaC- $\gamma$  | NM_017046.1      | 5'- CTA CAC ATT TAA CAA CAA AGA AAA TGC -3'<br>5'- TTC GTT TAT GTA TAA GAT GAC TTG CAG -3' | 73    | 94                 |
| $\beta$ -actin  | NM_031144.2      | 5'- CCC GCG AGT ACA ACC TTC T -3'<br>5'- CGT CAT CCA TGG CGA ACT -3'                       | 17    | 72                 |
| HPRT1           | NM_012583.2      | 5'- GGT CCA TTC CTA TGA CTG TAG ATT TT -3'<br>5'- CAA TCA AGA CGT TCT TTC CAG TT -3'       | 22    | 126                |
| Hmbs            | NM_013168.2      | 5'- TCC CTG AAG GAT GTG CCT AC -3'<br>5'- AAG GGT TTT CCC GTT TGC -3'                      | 79    | 73                 |

**Table S4. Numerical data of figures.**

To figure 1A

|             |       | Na <sup>+</sup> intake [g/d] |           |           |           |
|-------------|-------|------------------------------|-----------|-----------|-----------|
|             |       | Before                       | Week 1    | Week 2    | Week 3    |
| Nonpregnant | NS    | 0.15±0.01                    | 0.17±0.05 | 0.12±0.01 | 0.14±0.01 |
|             | HS    | 0.20±0.02                    | 3.25±1.10 | 3.58±1.28 | 3.48±1.87 |
|             | LS    | 0.15±0.05                    | 0.00±0.00 | 0.00±0.00 | 0.00±0.00 |
|             | HS/LS | 0.20±0.05                    | 3.63±1.14 | 3.81±1.76 | 0.00±0.00 |
| Pregnant    | NS    | 0.17±0.04                    | 0.23±0.06 | 0.17±0.10 | 0.19±0.10 |
|             | HS    | 0.13±0.01                    | 3.42±0.39 | 2.42±0.76 | 2.88±0.49 |
|             | LS    | 0.14±0.03                    | 0.00±0.00 | 0.00±0.00 | 0.00±0.00 |
|             | HS/LS | 0.17±0.03                    | 3.48±0.31 | 2.70±0.40 | 0.00±0.00 |

To figure 1B

|             |       | Urinary Na <sup>+</sup> excretion [mmol/mmol creatinine] |         |         |         |
|-------------|-------|----------------------------------------------------------|---------|---------|---------|
|             |       | Before                                                   | Week 1  | Week 2  | Week 3  |
| Nonpregnant | NS    | 15± 2                                                    | 15± 3   | 13± 3   | 13± 2   |
|             | HS    | 19± 4                                                    | 237± 45 | 279± 79 | 255±131 |
|             | LS    | 18± 4                                                    | 3± 1    | 1± 0    | 3± 1    |
|             | HS/LS | 22± 4                                                    | 220± 48 | 285± 19 | 5± 5    |
| Pregnant    | NS    | 24± 7                                                    | 15± 2   | 13± 7   | 11± 3   |
|             | HS    | 19± 6                                                    | 303± 24 | 174± 79 | 282± 67 |
|             | LS    | 18± 2                                                    | 4± 2    | 1± 1    | 0± 0    |
|             | HS/LS | 17± 5                                                    | 314± 36 | 199± 26 | 2± 2    |

To figure 1C

|             |       | Na <sup>+</sup> intake/urinary Na <sup>+</sup> excretion [(mg Na <sup>+</sup> )/(mmol Na <sup>+</sup> /mmol creatinine)] |           |           |           |
|-------------|-------|--------------------------------------------------------------------------------------------------------------------------|-----------|-----------|-----------|
|             |       | Before                                                                                                                   | Week 1    | Week 2    | Week 3    |
| Nonpregnant | NS    | 10.3± 1.6                                                                                                                | 11.5± 1.6 | 9.8± 0.9  | 10.8± 2.4 |
|             | HS    | 10.9± 2.8                                                                                                                | 14.3± 6.1 | 13.5± 5.2 | 13.6± 0.3 |
|             | LS    | 8.7± 1.2                                                                                                                 | 1.6± 0.7  | 2.6± 0.8  | 1.4± 0.3  |
|             | HS/LS | 9.8± 2.8                                                                                                                 | 17.2± 6.4 | 13.2± 5.2 | 4.0± 3.3  |
| Pregnant    | NS    | 7.9± 3.4                                                                                                                 | 15.0± 5.3 | 16.6± 7.9 | 15.7± 4.6 |
|             | HS    | 7.4± 2.5                                                                                                                 | 11.3± 1.5 | 14.9± 4.0 | 10.4± 1.4 |
|             | LS    | 7.5± 0.7                                                                                                                 | 1.6± 1.0  | 4.2± 2.2  | 38.6±31.9 |
|             | HS/LS | 10.3± 3.0                                                                                                                | 11.2± 1.4 | 13.9± 3.5 | 2.9± 2.4  |

To figures 2A-D

| Systolic blood pressure [% of baseline] |          |        |        |        |        |        |
|-----------------------------------------|----------|--------|--------|--------|--------|--------|
|                                         | Day      | NS     | HS     | LS     | HS/LS  |        |
| Nonpregnant                             | -2       | 100± 3 | 100± 3 | 101± 4 | 100± 3 |        |
|                                         | -1       | 100± 8 | 100± 3 | 99± 5  | 100± 3 |        |
|                                         | 01       | 102± 6 | 101± 1 | 103± 5 | 101± 1 |        |
|                                         | 02       | 103± 6 | 104± 3 | 102± 3 | 104± 3 |        |
|                                         | 05       | 103± 7 | 108± 3 | 102±10 | 108± 3 |        |
|                                         | 06       | 104± 4 | 107± 5 | 102± 7 | 107± 5 |        |
|                                         | 07       | 103± 4 | 108± 6 | 101± 7 | 108± 6 |        |
|                                         | 08       | 103± 5 | 107± 6 | 98± 5  | 107± 6 |        |
|                                         | 09       | 100± 4 | 106± 3 | 100± 6 | 106± 3 |        |
|                                         | 12       | 103± 3 | 104±11 | 102± 8 | 104±11 |        |
|                                         | 13       | 99± 2  | 103± 6 | 105± 6 | 103± 6 |        |
|                                         | 14       | 101± 2 | 100± 7 | 102± 4 | 103± 6 |        |
|                                         | 15       | 102± 1 | 107± 6 | 100± 4 | 92± 6  |        |
|                                         | 18       | 102± 2 | 106± 1 | 104± 8 | 91± 7  |        |
|                                         | 19       | 99± 2  | 106± 6 | 102± 6 | 92± 5  |        |
|                                         | Pregnant | -2     | 100± 3 | 100± 4 | 101±10 | 100± 4 |
|                                         |          | -1     | 100± 2 | 100± 7 | 100±12 | 100± 7 |
|                                         |          | 01     | 101± 6 | 98±10  | 101±12 | 98±10  |
|                                         |          | 02     | 102± 5 | 100±10 | 100± 8 | 100±10 |
| 05                                      |          | 103± 4 | 100± 6 | 106± 8 | 100± 9 |        |
| 06                                      |          | 103± 3 | 99± 7  | 104± 7 | 99± 7  |        |
| 07                                      |          | 103± 2 | 100± 9 | 104± 4 | 100± 9 |        |
| 08                                      |          | 103± 4 | 95±12  | 103± 7 | 95±12  |        |
| 09                                      |          | 102± 8 | 95± 8  | 103± 8 | 95± 8  |        |
| 12                                      |          | 102± 4 | 96± 7  | 104±10 | 96± 7  |        |
| 13                                      |          | 103± 7 | 99± 3  | 101± 7 | 99± 3  |        |
| 14                                      |          | 104± 6 | 97± 7  | 100± 5 | 97± 7  |        |
| 15                                      |          | 103± 5 | 96± 9  | 103± 6 | 92± 4  |        |
| 18                                      |          | 101± 4 | 89± 8  | 97±11  | 93± 6  |        |
| 19                                      |          | 99± 5  | 84±11  | 90± 5  | 85± 5  |        |

To figures 3A-B

| Change of normalized AUC of systolic blood pressure [% of baseline] |       |         |          |          |
|---------------------------------------------------------------------|-------|---------|----------|----------|
|                                                                     |       | Before  | Week 1+2 | Week 3   |
| Nonpregnant                                                         | NS    | 0.0±0.0 | 2.6±2.1  | 1.5±5.6  |
|                                                                     | HS    | 0.0±0.0 | 5.9±3.1  | 4.6±7.4  |
|                                                                     | LS    | 0.0±0.0 | 1.2±1.9  | 1.9±1.7  |
|                                                                     | HS/LS | 0.0±0.0 | 4.9±2.6  | -7.2±8.2 |
| Pregnant                                                            | NS    | 0.0±0.0 | 2.5±4.8  | 1.8±4.1  |
|                                                                     | HS    | 0.0±0.0 | -2.1±4.4 | -7.5±5.1 |
|                                                                     | LS    | 0.0±0.0 | 2.6±3.1  | -2.0±5.4 |
|                                                                     | HS/LS | 0.0±0.0 | -1.6±2.5 | -8.6±2.9 |

To figures 4A-E



| mRNA [relative expression] |      |         |         |         |         |
|----------------------------|------|---------|---------|---------|---------|
|                            |      | NS      | HS      | LS      | HS/LS   |
| Angiotensinogen            | C-NP | 1.0±0.2 | 1.3±0.1 | 0.5±0.1 | 0.7±0.2 |
|                            | C-P  | 1.0±0.2 | 1.0±0.3 | 1.1±0.2 | 0.7±0.1 |
|                            | M-NP | 1.0±0.3 | 1.6±0.3 | 1.1±0.6 | 0.6±0.2 |
|                            | M-P  | 1.4±0.1 | 1.7±0.4 | 1.8±0.4 | 1.6±0.1 |
| ACE                        | C-NP | 1.0±0.2 | 0.8±0.1 | 0.8±0.1 | 0.5±0.2 |
|                            | C-P  | 0.2±0.1 | 0.5±0.2 | 0.5±0.1 | 0.7±0.1 |
|                            | M-NP | 1.0±0.3 | 1.4±0.1 | 1.0±0.4 | 0.5±0.2 |
|                            | M-P  | 0.4±0.1 | 0.8±0.1 | 0.9±0.2 | 1.6±0.1 |
| Renin                      | C-NP | 1.0±0.5 | 0.3±0.1 | 1.0±0.5 | 0.5±0.1 |
|                            | C-P  | 1.0±0.5 | 0.3±0.1 | 2.0±0.3 | 1.1±0.4 |
|                            | M-NP | 1.0±0.3 | 0.2±0.2 | 1.1±0.3 | 0.2±0.1 |
|                            | M-P  | 0.2±0.1 | 0.3±0.1 | 0.6±0.2 | 0.3±0.1 |
| AGTR1a                     | C-NP | 1.0±0.2 | 1.2±0.1 | 0.6±0.1 | 0.7±0.1 |
|                            | C-P  | 0.9±0.3 | 0.5±0.2 | 0.5±0.1 | 0.4±0.1 |
|                            | M-NP | 1.0±0.2 | 1.8±0.2 | 0.7±0.1 | 1.0±0.1 |
|                            | M-P  | 0.8±0.2 | 1.2±0.2 | 0.4±0.1 | 0.5±0.1 |
| AGTR1b                     | C-NP | 1.0±0.2 | 0.9±0.1 | 0.8±0.2 | 1.0±0.2 |
|                            | C-P  | 0.9±0.5 | 0.5±0.2 | 0.6±0.2 | 0.4±0.1 |
|                            | M-NP | 1.0±0.3 | 1.2±0.1 | 1.0±0.2 | 1.0±0.3 |
|                            | M-P  | 0.8±0.3 | 1.7±0.4 | 0.6±0.3 | 0.5±0.2 |

To figure 5

| mRNA [relative expression] |      |         |         |         |         |
|----------------------------|------|---------|---------|---------|---------|
|                            |      | NS      | HS      | LS      | HS/LS   |
| ENaC- $\alpha$             | C-NP | 1.0±0.1 | 1.1±0.1 | 0.8±0.1 | 0.9±0.1 |
|                            | C-P  | 1.0±0.3 | 0.7±0.0 | 0.6±0.2 | 0.5±0.1 |
|                            | M-NP | 1.0±0.2 | 1.0±0.2 | 0.8±0.1 | 0.8±1.1 |
|                            | M-P  | 1.1±0.4 | 1.5±0.4 | 0.9±0.3 | 1.0±0.3 |
| ENaC- $\beta$              | C-NP | 1.0±0.2 | 1.9±0.1 | 0.9±0.2 | 1.0±0.3 |
|                            | C-P  | 1.3±0.7 | 0.9±0.3 | 0.5±0.1 | 0.4±0.1 |
|                            | M-NP | 1.0±0.3 | 0.9±0.2 | 0.7±0.2 | 0.7±0.3 |
|                            | M-P  | 0.7±0.1 | 0.7±0.1 | 0.4±0.2 | 0.4±0.1 |
| ENaC- $\gamma$             | C-NP | 1.0±0.3 | 1.7±0.1 | 0.9±0.2 | 0.7±0.2 |
|                            | C-P  | 0.8±0.4 | 0.6±0.3 | 0.3±0.1 | 0.2±0.1 |
|                            | M-NP | 1.0±0.3 | 0.8±0.4 | 0.7±0.2 | 0.8±0.3 |
|                            | M-P  | 0.7±0.3 | 1.0±0.1 | 0.6±0.4 | 0.4±0.1 |

To figures 6A-C

| Protein expression [% of $\beta$ -actin] |      |                |              |               |               |
|------------------------------------------|------|----------------|--------------|---------------|---------------|
|                                          |      | NS             | HS           | LS            | HS/LS         |
| ENaC- $\alpha$ full                      | C-NP | 100 $\pm$ 30   | 70 $\pm$ 10  | 100 $\pm$ 10  | 280 $\pm$ 40  |
|                                          | C-P  | 330 $\pm$ 90   | 210 $\pm$ 10 | 190 $\pm$ 10  | 510 $\pm$ 10  |
|                                          | M-NP | 110 $\pm$ 30   | 110 $\pm$ 10 | 120 $\pm$ 20  | 140 $\pm$ 60  |
|                                          | M-P  | 40 $\pm$ 40    | 110 $\pm$ 30 | 100 $\pm$ 10  | 220 $\pm$ 50  |
| ENaC- $\alpha$ cleaved                   | C-NP | 100 $\pm$ 30   | 100 $\pm$ 10 | 170 $\pm$ 10  | 520 $\pm$ 30  |
|                                          | C-P  | 420 $\pm$ 40   | 210 $\pm$ 20 | 200 $\pm$ 30  | 220 $\pm$ 10  |
|                                          | M-NP | 110 $\pm$ 100  | 110 $\pm$ 90 | 320 $\pm$ 20  | 660 $\pm$ 30  |
|                                          | M-P  | 700 $\pm$ 50   | 670 $\pm$ 50 | 2100 $\pm$ 30 | 1600 $\pm$ 50 |
| ENaC- $\beta$ full                       | C-NP | 100 $\pm$ 40   | 110 $\pm$ 10 | 70 $\pm$ 20   | 100 $\pm$ 30  |
|                                          | C-P  | 110 $\pm$ 20   | 100 $\pm$ 20 | 120 $\pm$ 20  | 190 $\pm$ 20  |
|                                          | M-NP | 100 $\pm$ 30   | 100 $\pm$ 30 | 110 $\pm$ 50  | 120 $\pm$ 100 |
|                                          | M-P  | 210 $\pm$ 50   | 360 $\pm$ 10 | 450 $\pm$ 40  | 520 $\pm$ 30  |
| ENaC- $\gamma$ full                      | C-NP | 100 $\pm$ 10   | 110 $\pm$ 20 | 120 $\pm$ 30  | 80 $\pm$ 20   |
|                                          | C-P  | 80 $\pm$ 40    | 80 $\pm$ 20  | 50 $\pm$ 50   | 70 $\pm$ 30   |
|                                          | M-NP | 110 $\pm$ 40   | 90 $\pm$ 10  | 120 $\pm$ 20  | 100 $\pm$ 20  |
|                                          | M-P  | 70 $\pm$ 70    | 380 $\pm$ 20 | 460 $\pm$ 20  | 240 $\pm$ 60  |
| ENaC- $\gamma$ cleaved                   | C-NP | 100 $\pm$ 10   | 100 $\pm$ 10 | 170 $\pm$ 20  | 7100 $\pm$ 10 |
|                                          | C-P  | 10500 $\pm$ 10 | 350 $\pm$ 80 | 80 $\pm$ 10   | 170 $\pm$ 50  |
|                                          | M-NP | 110 $\pm$ 30   | 70 $\pm$ 10  | 110 $\pm$ 30  | 90 $\pm$ 50   |
|                                          | M-P  | 40 $\pm$ 40    | 70 $\pm$ 10  | 90 $\pm$ 60   | 50 $\pm$ 50   |

Figure S1

### Study Design

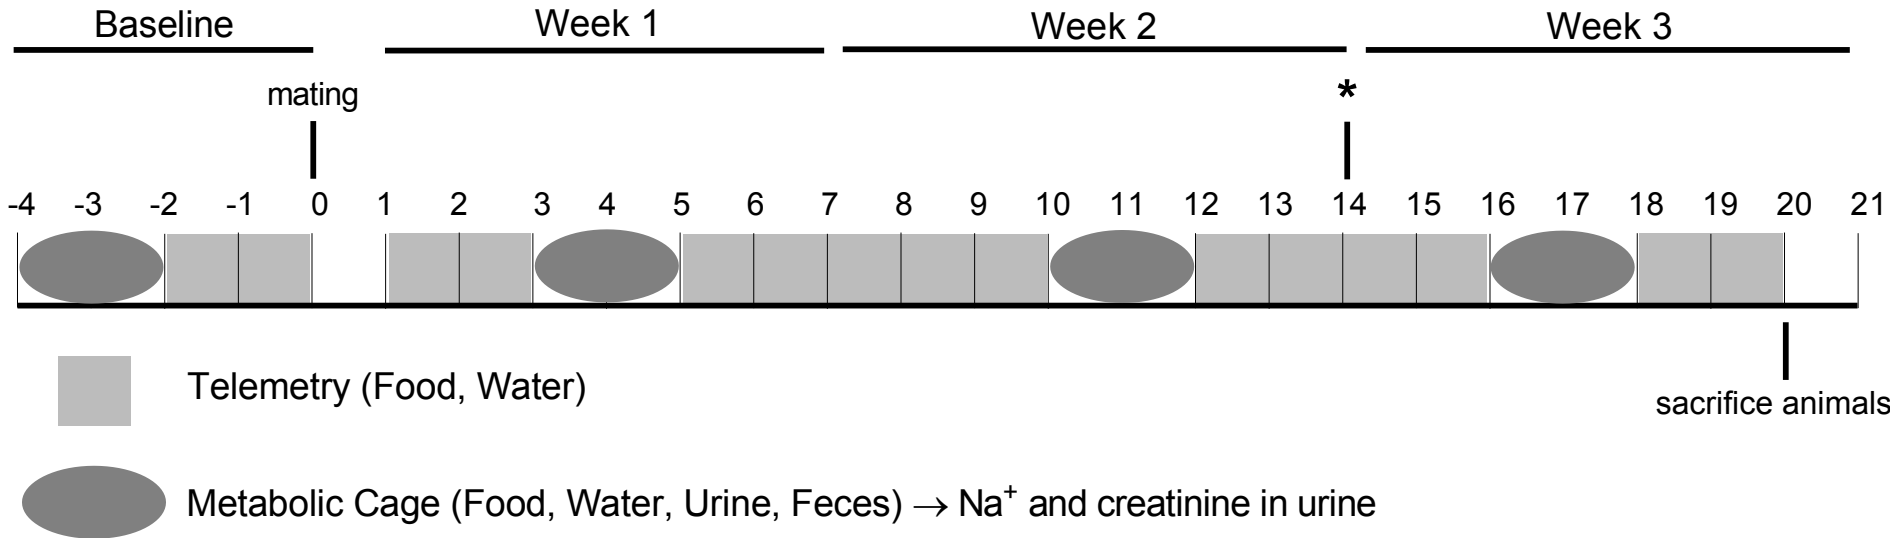

Figure S2

Typical telemetry data obtained during the experimental period

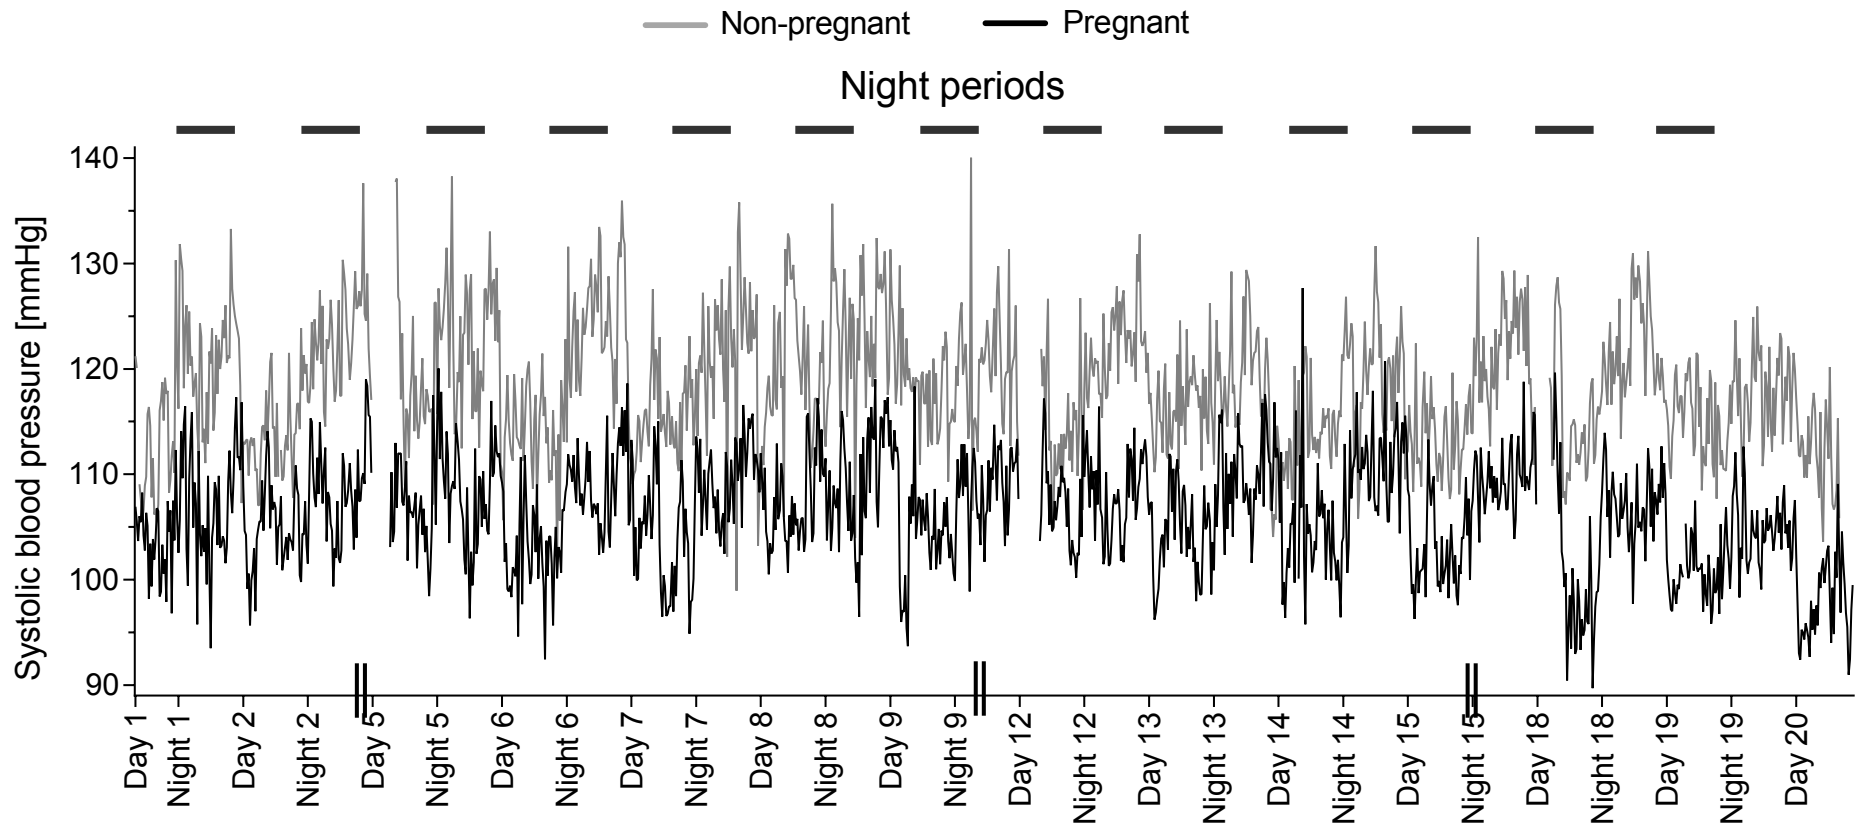

## Supplemental References:

1. Schumacher M, Frey FJ, Montani JP, Dick B, Frey BM, Ferrari P. Salt-sensitivity of blood pressure and decreased 11beta-hydroxysteroid dehydrogenase type 2 activity after renal transplantation. *Transplantation*. 2002;74:66-72.
2. Kastner C, Pohl M, Sendeski M, Stange G, Wagner CA, Jensen B, Patzak A, Bachmann S, Theilig F. Effects of receptor-mediated endocytosis and tubular protein composition on volume retention in experimental glomerulonephritis. *Am J Physiol Renal Physiol*. 2009;296:F902-11.
